# Supplementary material for: Cationic polymer-derived carbon dots for enhanced gene delivery and cell imaging
Source: Royal Society of Chemistry journal article supplement (doi:10.1039/c8bm01578c), 2019-01-01
Supplement: c8bm01578c1.pdf [file c8bm01578c1.pdf]

Supporting Information

## Cationic Polymer-Derived Carbon Dots for Enhanced Gene Delivery and Cell Imaging

*Xi He, Ping Chen, Ji Zhang\*, Tian-Ying Luo, Hai-Jiao Wang, Yan-Hong Liu and Xiao-Qi Yu\**

Key Laboratory of Green Chemistry and Technology (Ministry of Education), College of  
Chemistry, Sichuan University, Chengdu 610064, P. R. China

\*Corresponding authors: jzhang@scu.edu.cn (J. Zhang); xqyu@scu.edu.cn (X.-Q. Yu); Fax: +  
86 28 85415886

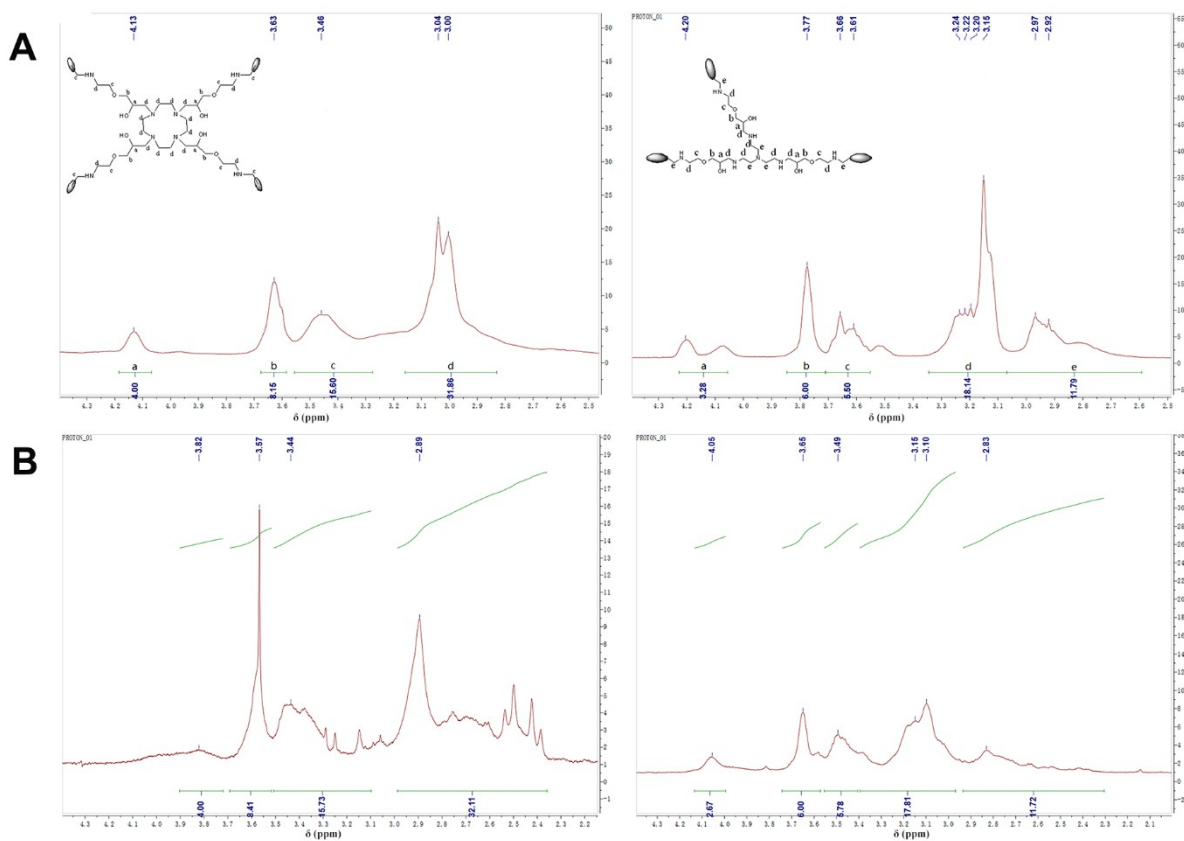

**Fig. S1.** The  $^1\text{H}$ -NMR spectra of (A) left: Pcyclen, right: Ptaea. (B) left: Cyclen-CD, right: Taea-CD.

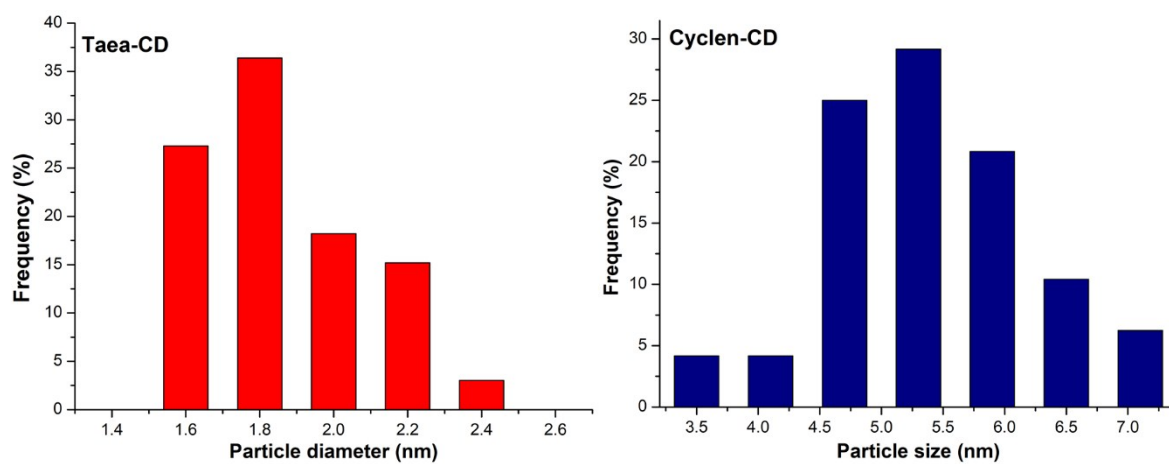

**Fig. S2.** The particle size distribution of the C-dots.

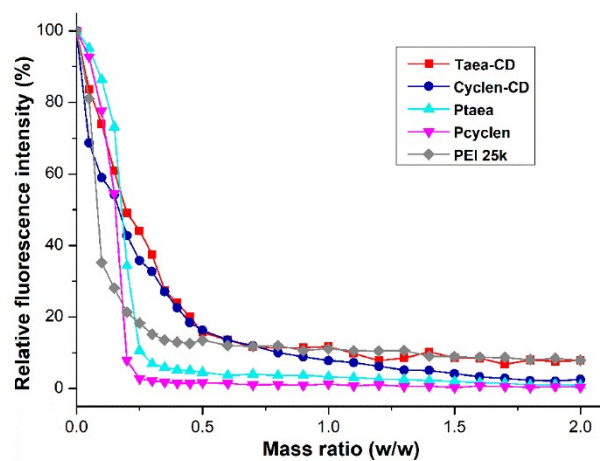

**Fig. S3.** Fluorescence quenching assay of EB/DNA by the addition of the C-dots and polymers, PEI 25 kDa was used as control.

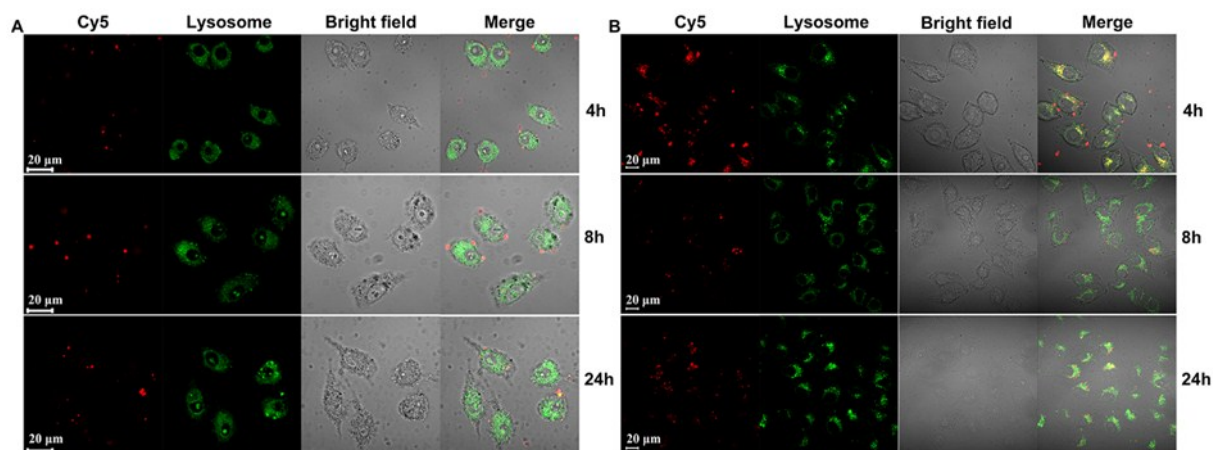

**Fig. S4.** Intracellular distribution of the complexes of **Ptatea**/DNA (A) and **Pcyclen**/DNA (B) in HeLa cells with 10% serum in different transfection time at w/w of 40.
